# Supplementary material for: Out of Florida: mtDNA reveals patterns of migration and Pleistocene range expansion of the Green Anole lizard (Anolis carolinensis)
Source: PubMed Central journal article supplement (PMC3488677; doi:10.1002/ece3.324), 2012-08-08
Supplement: ece30002-2274-SD4.pdf [file ece30002-2274-SD4.pdf]

|                     | N | S  | h | Hd      | K        | Pi      | PiJC    |
|---------------------|---|----|---|---------|----------|---------|---------|
| AR                  | 5 | 2  | 3 | 0.7     | 0.8      | 0.00171 | 0.00171 |
| MS                  | 5 | 2  | 3 | 0.8     | 1        | 0.00213 | 0.00214 |
| AL                  | 5 | 2  | 3 | 0.8     | 1        | 0.00213 | 0.00214 |
| Chipola_RiverFL     | 8 | 4  | 5 | 0.78571 | 1        | 0.00213 | 0.00214 |
| NC                  | 6 | 3  | 4 | 0.8667  | 1.2      | 0.00256 | 0.00256 |
| CC_TX               | 5 | 3  | 3 | 0.7     | 1.2      | 0.00256 | 0.00257 |
| GainesvilleFL       | 3 | 2  | 3 | 1       | 1.3333   | 0.00284 | 0.00285 |
| SC                  | 5 | 3  | 4 | 0.9     | 1.4      | 0.00299 | 0.00299 |
| OR_TX               | 5 | 3  | 3 | 0.7     | 1.4      | 0.00299 | 0.00299 |
| GA                  | 5 | 3  | 3 | 0.8     | 1.4      | 0.00299 | 0.00299 |
| TY_TX               | 5 | 3  | 4 | 0.9     | 1.4      | 0.00299 | 0.00299 |
| Houston_TX          | 4 | 3  | 3 | 0.83333 | 1.5      | 0.0032  | 0.00321 |
| Highland_HammocksFL | 5 | 5  | 4 | 0.9     | 2        | 0.00426 | 0.00428 |
| S_LA                | 5 | 4  | 3 | 0.8     | 2.2      | 0.00469 | 0.00471 |
| BV_TX               | 5 | 5  | 4 | 0.9     | 2.2      | 0.00469 | 0.00471 |
| N_FL                | 5 | 6  | 4 | 0.9     | 2.6      | 0.00554 | 0.00557 |
| E_TN                | 5 | 5  | 3 | 0.7     | 2.6      | 0.00554 | 0.00558 |
| W_TN                | 5 | 7  | 4 | 0.9     | 2.8      | 0.00597 | 0.00601 |
| InvernessFL         | 3 | 6  | 3 | 1       | 4        | 0.00853 | 0.00859 |
| N_LA                | 5 | 10 | 4 | 0.9     | 4.6      | 0.00981 | 0.00989 |
| SE_FL               | 5 | 13 | 5 | 1       | 5.8      | 0.01237 | 0.01248 |
| SW_FL               | 4 | 13 | 4 | 1       | 7.33333  | 0.01564 | 0.01582 |
| RedRoadFL           | 8 | 26 | 8 | 1       | 8.32143  | 0.01774 | 0.01802 |
| Floral_CityFL       | 4 | 17 | 4 | 1       | 8.5      | 0.01812 | 0.01837 |
| PalatkaFL           | 3 | 13 | 3 | 1       | 8.66667  | 0.01848 | 0.01876 |
| Doc_ThomasFL        | 5 | 18 | 5 | 1       | 9        | 0.01919 | 0.01947 |
| ParklandFL          | 3 | 14 | 3 | 1       | 9.33333  | 0.0199  | 0.0217  |
| W-FL                | 6 | 29 | 3 | 0.6     | 9.876    | 0.02104 | 0.02193 |
| C_FL                | 5 | 39 | 5 | 1       | 17.4     | 0.0371  | 0.03867 |
| EconfinaFL          | 4 | 32 | 3 | 0.83333 | 21.16667 | 0.04513 | 0.04727 |
