# Supplementary material for: Out of Florida: mtDNA reveals patterns of migration and Pleistocene range expansion of the Green Anole lizard (Anolis carolinensis)
Source: PubMed Central journal article supplement (PMC3488677; doi:10.1002/ece3.324), 2012-08-08
Supplement: ece30002-2274-SD5.pdf [file ece30002-2274-SD5.pdf]

| Population 1 | Population 2     | Nst     | Fst     |
|--------------|------------------|---------|---------|
| S_LA         | MS               | 0.46748 | 0.46667 |
| S_LA         | W_FL             | 0.18447 | 0.18468 |
| S_LA         | SW_FL            | 0.84492 | 0.83951 |
| S_LA         | SE_FL            | 0.87744 | 0.87261 |
| S_LA         | NC               | 0.87881 | 0.87681 |
| S_LA         | SC               | 0.43853 | 0.4375  |
| S_LA         | AL               | 0.46748 | 0.46667 |
| S_LA         | OR_TX            | 0.1827  | 0.18182 |
| S_LA         | BV_TX            | 0.1545  | 0.15385 |
| S_LA         | W_TN             | 0.34323 | 0.34211 |
| S_LA         | C_FL             | 0.47388 | 0.47761 |
| S_LA         | N_FL             | 0.36957 | 0.36842 |
| S_LA         | GA               | 0.43845 | 0.4375  |
| S_LA         | ETN              | 0.5881  | 0.58621 |
| S_LA         | AR               | 0.16701 | 0.16667 |
| S_LA         | CC_TX            | 0.15058 | 0.15    |
| S_LA         | TY_TX            | 0.43848 | 0.4375  |
| S_LA         | N_LA             | 0.11442 | 0.11458 |
| S_LA         | ChipolaRiverFL   | 0.44906 | 0.44828 |
| S_LA         | HighlandHammocks | 0.93132 | 0.92857 |
| S_LA         | FloralCityFL     | 0.85749 | 0.85139 |
| S_LA         | Chipola_River    | 0.44906 | 0.44828 |
| S_LA         | HoustonTX        | 0.30293 | 0.30189 |
| S_LA         | RedRoadFL        | 0.82841 | 0.82302 |
| S_LA         | ParklandFL       | 0.81648 | 0.81031 |
| S_LA         | GainesvilleFL    | 0.94873 | 0.94636 |
| S_LA         | EconfinaFL       | 0.35951 | 0.35629 |
| S_LA         | InvernessFL      | 0.91041 | 0.90644 |
| S_LA         | PalatkaFL        | 0.43276 | 0.43007 |
| S_LA         | DocThomasFL      | 0.80852 | 0.80282 |
| MS           | W_FL             | 0.03072 | 0.02976 |
| MS           | SW_FL            | 0.85629 | 0.85172 |
| MS           | SE_FL            | 0.88915 | 0.88514 |
| MS           | NC               | 0.92053 | 0.91912 |
| MS           | SC               | 0.14323 | 0.14286 |
| MS           | AL               | 0.1669  | 0.16667 |
| MS           | OR_TX            | 0.50082 | 0.5     |
| MS           | BV_TX            | 0.39442 | 0.39394 |
| MS           | W_TN             | 0.05007 | 0.05    |
| MS           | C_FL             | 0.47151 | 0.47727 |
| MS           | N_FL             | 0.09959 | 0.1     |
| MS           | GA               | 0.14303 | 0.14286 |
| MS           | ETN              | 0.55115 | 0.55    |
| MS           | AR               | 0.55058 | 0.55    |
| MS           | CC_TX            | 0.50062 | 0.5     |
| MS           | TY_TX            | 0.64803 | 0.64706 |

|       |                  |         |         |
|-------|------------------|---------|---------|
| MS    | N_LA             | 0.17532 | 0.17647 |
| MS    | ChipolaRiverFL   | 0.09108 | 0.09091 |
| MS    | HighlandHammocks | 0.94765 | 0.94565 |
| MS    | FloralCityFL     | 0.86797 | 0.86272 |
| MS    | Chipola_River    | 0.09108 | 0.09091 |
| MS    | HoustonTX        | 0.56236 | 0.5614  |
| MS    | RedRoadFL        | 0.8379  | 0.8334  |
| MS    | ParklandFL       | 0.82462 | 0.81935 |
| MS    | GainesvilleFL    | 0.9643  | 0.96269 |
| MS    | EconfinaFL       | 0.32375 | 0.32212 |
| MS    | InvernessFL      | 0.92407 | 0.92089 |
| MS    | PalatkaFL        | 0.41724 | 0.41532 |
| MS    | DocThomasFL      | 0.81682 | 0.81203 |
| W_FL  | SW_FL            | 0.63795 | 0.63404 |
| W_FL  | SE_FL            | 0.70875 | 0.70551 |
| W_FL  | NC               | 0.64937 | 0.65296 |
| W_FL  | SC               | 0.01832 | 0.01744 |
| W_FL  | AL               | 0.03072 | 0.02976 |
| W_FL  | OR_TX            | 0.17057 | 0.17157 |
| W_FL  | BV_TX            | 0.14521 | 0.14623 |
| W_FL  | W_TN             | 0.00249 | 0       |
| W_FL  | C_FL             | 0.30007 | 0.3056  |
| W_FL  | N_FL             | 0.02847 | 0.02604 |
| W_FL  | GA               | 0.01827 | 0.01744 |
| W_FL  | ETN              | 0.25762 | 0.25794 |
| W_FL  | AR               | 0.16483 | 0.16667 |
| W_FL  | CC_TX            | 0.16042 | 0.16162 |
| W_FL  | TY_TX            | 0.27559 | 0.27778 |
| W_FL  | N_LA             | 0.0669  | 0.06466 |
| W_FL  | ChipolaRiverFL   | 0.00558 | 0.00458 |
| W_FL  | HighlandHammocks | 0.78461 | 0.78346 |
| W_FL  | FloralCityFL     | 0.733   | 0.72723 |
| W_FL  | Chipola_River    | 0.00558 | 0.00458 |
| W_FL  | HoustonTX        | 0.17456 | 0.17831 |
| W_FL  | RedRoadFL        | 0.63361 | 0.63039 |
| W_FL  | ParklandFL       | 0.62768 | 0.62353 |
| W_FL  | GainesvilleFL    | 0.81791 | 0.81639 |
| W_FL  | EconfinaFL       | 0.1467  | 0.14587 |
| W_FL  | InvernessFL      | 0.77747 | 0.77432 |
| W_FL  | PalatkaFL        | 0.16457 | 0.166   |
| W_FL  | DocThomasFL      | 0.60221 | 0.59915 |
| SW_FL | SE_FL            | 0.61219 | 0.60679 |
| SW_FL | NC               | 0.85048 | 0.84578 |
| SW_FL | SC               | 0.84831 | 0.84349 |
| SW_FL | AL               | 0.85629 | 0.85172 |
| SW_FL | OR_TX            | 0.85586 | 0.85097 |
| SW_FL | BV_TX            | 0.84042 | 0.83506 |

|       |                  |         |         |
|-------|------------------|---------|---------|
| SW_FL | W_TN             | 0.82785 | 0.82222 |
| SW_FL | C_FL             | 0.60919 | 0.60363 |
| SW_FL | N_FL             | 0.83376 | 0.82814 |
| SW_FL | GA               | 0.8483  | 0.84349 |
| SW_FL | ETN              | 0.84497 | 0.83927 |
| SW_FL | AR               | 0.86376 | 0.85928 |
| SW_FL | CC_TX            | 0.85813 | 0.85338 |
| SW_FL | TY_TX            | 0.86083 | 0.85589 |
| SW_FL | N_LA             | 0.80715 | 0.80045 |
| SW_FL | ChipolaRiverFL   | 0.8544  | 0.84985 |
| SW_FL | HighlandHammocks | 0.85577 | 0.85043 |
| SW_FL | FloralCityFL     | 0.76587 | 0.75734 |
| SW_FL | Chipola_River    | 0.8544  | 0.84985 |
| SW_FL | HoustonTX        | 0.84642 | 0.84155 |
| SW_FL | RedRoadFL        | 0.35607 | 0.35277 |
| SW_FL | ParklandFL       | 0.43017 | 0.42529 |
| SW_FL | GainesvilleFL    | 0.86436 | 0.85946 |
| SW_FL | EconfinaFL       | 0.52432 | 0.52101 |
| SW_FL | InvernessFL      | 0.81857 | 0.81215 |
| SW_FL | PalatkaFL        | 0.7096  | 0.70186 |
| SW_FL | DocThomasFL      | 0.36102 | 0.35696 |
| SE_FL | NC               | 0.89369 | 0.88947 |
| SE_FL | SC               | 0.88182 | 0.87755 |
| SE_FL | AL               | 0.88756 | 0.88356 |
| SE_FL | OR_TX            | 0.88743 | 0.88312 |
| SE_FL | BV_TX            | 0.87321 | 0.86842 |
| SE_FL | W_TN             | 0.86328 | 0.85818 |
| SE_FL | C_FL             | 0.66888 | 0.66279 |
| SE_FL | N_FL             | 0.8669  | 0.86184 |
| SE_FL | GA               | 0.87977 | 0.87552 |
| SE_FL | ETN              | 0.87298 | 0.86792 |
| SE_FL | AR               | 0.89535 | 0.89145 |
| SE_FL | CC_TX            | 0.88979 | 0.88562 |
| SE_FL | TY_TX            | 0.89114 | 0.88679 |
| SE_FL | N_LA             | 0.83747 | 0.83139 |
| SE_FL | ChipolaRiverFL   | 0.88756 | 0.88356 |
| SE_FL | HighlandHammocks | 0.88512 | 0.88037 |
| SE_FL | FloralCityFL     | 0.80321 | 0.79513 |
| SE_FL | Chipola_River    | 0.88756 | 0.88356 |
| SE_FL | HoustonTX        | 0.88081 | 0.87648 |
| SE_FL | RedRoadFL        | 0.44857 | 0.44513 |
| SE_FL | ParklandFL       | 0.01346 | 0.01304 |
| SE_FL | GainesvilleFL    | 0.89583 | 0.89148 |
| SE_FL | EconfinaFL       | 0.5735  | 0.56991 |
| SE_FL | InvernessFL      | 0.85957 | 0.85359 |
| SE_FL | PalatkaFL        | 0.76638 | 0.75889 |
| SE_FL | DocThomasFL      | 0.31493 | 0.31227 |

|    |                  |         |         |
|----|------------------|---------|---------|
| NC | SC               | 0.90744 | 0.9058  |
| NC | AL               | 0.92053 | 0.91912 |
| NC | OR_TX            | 0.91382 | 0.91216 |
| NC | BV_TX            | 0.89021 | 0.88816 |
| NC | W_TN             | 0.85929 | 0.85714 |
| NC | C_FL             | 0.44923 | 0.45294 |
| NC | N_FL             | 0.87032 | 0.86806 |
| NC | GA               | 0.9046  | 0.90299 |
| NC | ETN              | 0.88639 | 0.88415 |
| NC | AR               | 0.93185 | 0.93056 |
| NC | CC_TX            | 0.91933 | 0.91781 |
| NC | TY_TX            | 0.9194  | 0.91772 |
| NC | N_LA             | 0.81455 | 0.81169 |
| NC | ChipolaRiverFL   | 0.91839 | 0.91698 |
| NC | HighlandHammocks | 0.95593 | 0.95376 |
| NC | FloralCityFL     | 0.87352 | 0.86803 |
| NC | Chipola_River    | 0.91839 | 0.91698 |
| NC | HoustonTX        | 0.91319 | 0.91148 |
| NC | RedRoadFL        | 0.83938 | 0.83465 |
| NC | ParklandFL       | 0.83383 | 0.82826 |
| NC | GainesvilleFL    | 0.96413 | 0.96238 |
| NC | EconfinaFL       | 0.52845 | 0.52912 |
| NC | InvernessFL      | 0.92689 | 0.92353 |
| NC | PalatkaFL        | 0.38353 | 0.38333 |
| NC | DocThomasFL      | 0.82971 | 0.82454 |
| SC | AL               | 0.14323 | 0.14286 |
| SC | OR_TX            | 0.3866  | 0.38596 |
| SC | BV_TX            | 0.38419 | 0.38356 |
| SC | W_TN             | 0.04587 | 0.04545 |
| SC | C_FL             | 0.4641  | 0.46953 |
| SC | N_FL             | 0.09086 | 0.09091 |
| SC | GA               | 0.12538 | 0.125   |
| SC | ETN              | 0.5252  | 0.52381 |
| SC | AR               | 0.50066 | 0.5     |
| SC | CC_TX            | 0.45909 | 0.45833 |
| SC | TY_TX            | 0.61223 | 0.61111 |
| SC | N_LA             | 0.16597 | 0.16667 |
| SC | ChipolaRiverFL   | 0.07725 | 0.07692 |
| SC | HighlandHammocks | 0.94021 | 0.93796 |
| SC | FloralCityFL     | 0.86161 | 0.8561  |
| SC | Chipola_River    | 0.07725 | 0.07692 |
| SC | HoustonTX        | 0.5257  | 0.52459 |
| SC | RedRoadFL        | 0.83163 | 0.82687 |
| SC | ParklandFL       | 0.81655 | 0.81103 |
| SC | GainesvilleFL    | 0.95788 | 0.95601 |
| SC | EconfinaFL       | 0.31164 | 0.30989 |
| SC | InvernessFL      | 0.91746 | 0.91401 |

|       |                  |         |         |
|-------|------------------|---------|---------|
| SC    | PalatkaFL        | 0.40782 | 0.40551 |
| SC    | DocThomasFL      | 0.80927 | 0.80422 |
| AL    | OR_TX            | 0.50082 | 0.5     |
| AL    | BV_TX            | 0.42912 | 0.42857 |
| AL    | W_TN             | 0.05007 | 0.05    |
| AL    | C_FL             | 0.47151 | 0.47727 |
| AL    | N_FL             | 0.09959 | 0.1     |
| AL    | GA               | 0.14303 | 0.14286 |
| AL    | ETN              | 0.53715 | 0.53608 |
| AL    | AR               | 0.55058 | 0.55    |
| AL    | CC_TX            | 0.50062 | 0.5     |
| AL    | TY_TX            | 0.64803 | 0.64706 |
| AL    | N_LA             | 0.17532 | 0.17647 |
| AL    | ChipolaRiverFL   | 0.09108 | 0.09091 |
| AL    | HighlandHammocks | 0.94765 | 0.94565 |
| AL    | FloralCityFL     | 0.86634 | 0.86111 |
| AL    | Chipola_River    | 0.09108 | 0.09091 |
| AL    | HoustonTX        | 0.56236 | 0.5614  |
| AL    | RedRoadFL        | 0.83545 | 0.83098 |
| AL    | ParklandFL       | 0.82203 | 0.81678 |
| AL    | GainesvilleFL    | 0.96381 | 0.9622  |
| AL    | EconfinaFL       | 0.31497 | 0.31373 |
| AL    | InvernessFL      | 0.92305 | 0.91987 |
| AL    | PalatkaFL        | 0.41724 | 0.41532 |
| AL    | DocThomasFL      | 0.81392 | 0.80916 |
| OR_TX | BV_TX            | 0.10038 | 0.1     |
| OR_TX | W_TN             | 0.34452 | 0.34375 |
| OR_TX | C_FL             | 0.4957  | 0.5     |
| OR_TX | N_FL             | 0.37583 | 0.375   |
| OR_TX | GA               | 0.4624  | 0.46154 |
| OR_TX | ETN              | 0.61696 | 0.61538 |
| OR_TX | AR               | 0.08395 | 0.08333 |
| OR_TX | CC_TX            | 0.07215 | 0.07143 |
| OR_TX | TY_TX            | 0.46244 | 0.46154 |
| OR_TX | N_LA             | 0.1173  | 0.11765 |
| OR_TX | ChipolaRiverFL   | 0.47906 | 0.47826 |
| OR_TX | HighlandHammocks | 0.94324 | 0.94097 |
| OR_TX | FloralCityFL     | 0.86731 | 0.86173 |
| OR_TX | Chipola_River    | 0.47906 | 0.47826 |
| OR_TX | HoustonTX        | 0.29374 | 0.29268 |
| OR_TX | RedRoadFL        | 0.83825 | 0.83339 |
| OR_TX | ParklandFL       | 0.82554 | 0.81991 |
| OR_TX | GainesvilleFL    | 0.95978 | 0.95791 |
| OR_TX | EconfinaFL       | 0.35932 | 0.35708 |
| OR_TX | InvernessFL      | 0.92115 | 0.91768 |
| OR_TX | PalatkaFL        | 0.47089 | 0.46831 |
| OR_TX | DocThomasFL      | 0.81812 | 0.81295 |

|       |                  |         |         |
|-------|------------------|---------|---------|
| BV_TX | W_TN             | 0.30642 | 0.30556 |
| BV_TX | C_FL             | 0.4827  | 0.48637 |
| BV_TX | N_FL             | 0.33419 | 0.33333 |
| BV_TX | GA               | 0.40067 | 0.4     |
| BV_TX | ETN              | 0.57322 | 0.57143 |
| BV_TX | AR               | 0.06216 | 0.0625  |
| BV_TX | CC_TX            | 0.05553 | 0.05556 |
| BV_TX | TY_TX            | 0.4007  | 0.4     |
| BV_TX | N_LA             | 0.10525 | 0.10526 |
| BV_TX | ChipolaRiverFL   | 0.4079  | 0.40741 |
| BV_TX | HighlandHammocks | 0.92983 | 0.92708 |
| BV_TX | FloralCityFL     | 0.85493 | 0.84887 |
| BV_TX | Chipola_River    | 0.4079  | 0.40741 |
| BV_TX | HoustonTX        | 0.24558 | 0.2449  |
| BV_TX | RedRoadFL        | 0.82439 | 0.81906 |
| BV_TX | ParklandFL       | 0.80994 | 0.80385 |
| BV_TX | GainesvilleFL    | 0.94727 | 0.94491 |
| BV_TX | EconfinaFL       | 0.3367  | 0.33428 |
| BV_TX | InvernessFL      | 0.90828 | 0.90432 |
| BV_TX | PalatkaFL        | 0.45246 | 0.44932 |
| BV_TX | DocThomasFL      | 0.80243 | 0.79681 |
| W_TN  | C_FL             | 0.43201 | 0.43638 |
| W_TN  | N_FL             | 0.02193 | 0.02174 |
| W_TN  | GA               | 0.0093  | 0.00943 |
| W_TN  | ETN              | 0.26674 | 0.2663  |
| W_TN  | AR               | 0.35735 | 0.35714 |
| W_TN  | CC_TX            | 0.33382 | 0.33333 |
| W_TN  | TY_TX            | 0.501   | 0.5     |
| W_TN  | N_LA             | 0.11921 | 0.11905 |
| W_TN  | ChipolaRiverFL   | 0.00006 | 0       |
| W_TN  | HighlandHammocks | 0.91768 | 0.91465 |
| W_TN  | FloralCityFL     | 0.84159 | 0.83528 |
| W_TN  | Chipola_River    | 0.00006 | 0       |
| W_TN  | HoustonTX        | 0.41194 | 0.41096 |
| W_TN  | RedRoadFL        | 0.80994 | 0.80437 |
| W_TN  | ParklandFL       | 0.79909 | 0.79271 |
| W_TN  | GainesvilleFL    | 0.9357  | 0.93305 |
| W_TN  | EconfinaFL       | 0.27847 | 0.27593 |
| W_TN  | InvernessFL      | 0.89526 | 0.89103 |
| W_TN  | PalatkaFL        | 0.35137 | 0.34848 |
| W_TN  | DocThomasFL      | 0.78929 | 0.78341 |
| C_FL  | N_FL             | 0.43881 | 0.44321 |
| C_FL  | GA               | 0.45006 | 0.45602 |
| C_FL  | ETN              | 0.49548 | 0.49799 |
| C_FL  | AR               | 0.50033 | 0.50543 |
| C_FL  | CC_TX            | 0.48624 | 0.49125 |
| C_FL  | TY_TX            | 0.52079 | 0.52429 |

|      |                  |         |         |
|------|------------------|---------|---------|
| C_FL | N_LA             | 0.42604 | 0.42827 |
| C_FL | ChipolaRiverFL   | 0.46211 | 0.46821 |
| C_FL | HighlandHammocks | 0.6921  | 0.6891  |
| C_FL | FloralCityFL     | 0.66175 | 0.65328 |
| C_FL | Chipola_River    | 0.46211 | 0.46821 |
| C_FL | HoustonTX        | 0.50527 | 0.50909 |
| C_FL | RedRoadFL        | 0.60205 | 0.59621 |
| C_FL | ParklandFL       | 0.60119 | 0.59413 |
| C_FL | GainesvilleFL    | 0.72361 | 0.72012 |
| C_FL | EconfinaFL       | 0.24835 | 0.24821 |
| C_FL | InvernessFL      | 0.68854 | 0.68343 |
| C_FL | PalatkaFL        | 0.10734 | 0.11136 |
| C_FL | DocThomasFL      | 0.59329 | 0.58698 |
| N_FL | GA               | 0.09073 | 0.09091 |
| N_FL | ETN              | 0.44126 | 0.43966 |
| N_FL | AR               | 0.39319 | 0.39286 |
| N_FL | CC_TX            | 0.34976 | 0.34932 |
| N_FL | TY_TX            | 0.525   | 0.52381 |
| N_FL | N_LA             | 0.14278 | 0.14286 |
| N_FL | ChipolaRiverFL   | 0.05208 | 0.05263 |
| N_FL | HighlandHammocks | 0.92086 | 0.91786 |
| N_FL | FloralCityFL     | 0.84865 | 0.84233 |
| N_FL | Chipola_River    | 0.05208 | 0.05263 |
| N_FL | HoustonTX        | 0.43946 | 0.43836 |
| N_FL | RedRoadFL        | 0.81546 | 0.8099  |
| N_FL | ParklandFL       | 0.80246 | 0.79613 |
| N_FL | GainesvilleFL    | 0.94092 | 0.93828 |
| N_FL | EconfinaFL       | 0.3064  | 0.30303 |
| N_FL | InvernessFL      | 0.90173 | 0.89752 |
| N_FL | PalatkaFL        | 0.38187 | 0.37868 |
| N_FL | DocThomasFL      | 0.79355 | 0.7877  |
| GA   | ETN              | 0.52514 | 0.52381 |
| GA   | AR               | 0.50053 | 0.5     |
| GA   | CC_TX            | 0.45897 | 0.45833 |
| GA   | TY_TX            | 0.61215 | 0.61111 |
| GA   | N_LA             | 0.12676 | 0.12791 |
| GA   | ChipolaRiverFL   | 0.07703 | 0.07692 |
| GA   | HighlandHammocks | 0.94065 | 0.93841 |
| GA   | FloralCityFL     | 0.85857 | 0.85312 |
| GA   | Chipola_River    | 0.07703 | 0.07692 |
| GA   | HoustonTX        | 0.52561 | 0.52459 |
| GA   | RedRoadFL        | 0.8248  | 0.82014 |
| GA   | ParklandFL       | 0.81472 | 0.80924 |
| GA   | GainesvilleFL    | 0.95671 | 0.95485 |
| GA   | EconfinaFL       | 0.2935  | 0.29258 |
| GA   | InvernessFL      | 0.91596 | 0.91253 |
| GA   | PalatkaFL        | 0.38815 | 0.38618 |

|       |                  |         |         |
|-------|------------------|---------|---------|
| GA    | DocThomasFL      | 0.80373 | 0.79876 |
| ETN   | AR               | 0.64701 | 0.64583 |
| ETN   | CC_TX            | 0.62139 | 0.62    |
| ETN   | TY_TX            | 0.67911 | 0.67742 |
| ETN   | N_LA             | 0.42104 | 0.41935 |
| ETN   | ChipolaRiverFL   | 0.53959 | 0.53846 |
| ETN   | HighlandHammocks | 0.92732 | 0.92434 |
| ETN   | FloralCityFL     | 0.8486  | 0.84233 |
| ETN   | Chipola_River    | 0.53959 | 0.53846 |
| ETN   | HoustonTX        | 0.63886 | 0.63717 |
| ETN   | RedRoadFL        | 0.82467 | 0.81903 |
| ETN   | ParklandFL       | 0.81269 | 0.80628 |
| ETN   | GainesvilleFL    | 0.94086 | 0.93828 |
| ETN   | EconfinaFL       | 0.34343 | 0.34164 |
| ETN   | InvernessFL      | 0.90168 | 0.89752 |
| ETN   | PalatkaFL        | 0.49473 | 0.49096 |
| ETN   | DocThomasFL      | 0.80456 | 0.79861 |
| AR    | CC_TX            | 0.00026 | 0       |
| AR    | TY_TX            | 0.5006  | 0.5     |
| AR    | N_LA             | 0.09875 | 0.1     |
| AR    | ChipolaRiverFL   | 0.52686 | 0.52632 |
| AR    | HighlandHammocks | 0.95257 | 0.9507  |
| AR    | FloralCityFL     | 0.8738  | 0.86864 |
| AR    | Chipola_River    | 0.52686 | 0.52632 |
| AR    | HoustonTX        | 0.30373 | 0.30303 |
| AR    | RedRoadFL        | 0.84594 | 0.8415  |
| AR    | ParklandFL       | 0.83287 | 0.82766 |
| AR    | GainesvilleFL    | 0.96821 | 0.96674 |
| AR    | EconfinaFL       | 0.36101 | 0.35957 |
| AR    | InvernessFL      | 0.92899 | 0.92593 |
| AR    | PalatkaFL        | 0.47991 | 0.47794 |
| AR    | DocThomasFL      | 0.8259  | 0.82117 |
| CC_TX | TY_TX            | 0.45902 | 0.45833 |
| CC_TX | N_LA             | 0.09297 | 0.09375 |
| CC_TX | ChipolaRiverFL   | 0.47678 | 0.47619 |
| CC_TX | HighlandHammocks | 0.94539 | 0.94326 |
| CC_TX | FloralCityFL     | 0.86919 | 0.86376 |
| CC_TX | Chipola_River    | 0.47678 | 0.47619 |
| CC_TX | HoustonTX        | 0.27108 | 0.27027 |
| CC_TX | RedRoadFL        | 0.84011 | 0.83541 |
| CC_TX | ParklandFL       | 0.82673 | 0.82127 |
| CC_TX | GainesvilleFL    | 0.96248 | 0.96074 |
| CC_TX | EconfinaFL       | 0.35738 | 0.35543 |
| CC_TX | InvernessFL      | 0.92357 | 0.92025 |
| CC_TX | PalatkaFL        | 0.46996 | 0.46763 |
| CC_TX | DocThomasFL      | 0.81968 | 0.81468 |
| TY_TX | N_LA             | 0.31849 | 0.31818 |



|                  |                  |          |          |
|------------------|------------------|----------|----------|
| TY_TX            | ChipolaRiverFL   | 0.63731  | 0.63636  |
| TY_TX            | HighlandHammocks | 0.94485  | 0.94257  |
| TY_TX            | FloralCityFL     | 0.87038  | 0.86475  |
| TY_TX            | Chipola_River    | 0.63731  | 0.63636  |
| TY_TX            | HoustonTX        | 0.52566  | 0.52459  |
| TY_TX            | RedRoadFL        | 0.84359  | 0.83865  |
| TY_TX            | ParklandFL       | 0.83147  | 0.82576  |
| TY_TX            | GainesvilleFL    | 0.9608   | 0.95892  |
| TY_TX            | EconfinaFL       | 0.39062  | 0.38844  |
| TY_TX            | InvernessFL      | 0.92345  | 0.91996  |
| TY_TX            | PalatkaFL        | 0.5219   | 0.51911  |
| TY_TX            | DocThomasFL      | 0.8247   | 0.81944  |
| N_LA             | ChipolaRiverFL   | 0.1236   | 0.125    |
| N_LA             | HighlandHammocks | 0.89329  | 0.88926  |
| N_LA             | FloralCityFL     | 0.82703  | 0.81956  |
| N_LA             | Chipola_River    | 0.1236   | 0.125    |
| N_LA             | HoustonTX        | 0.20791  | 0.20779  |
| N_LA             | RedRoadFL        | 0.78667  | 0.78006  |
| N_LA             | ParklandFL       | 0.77622  | 0.76881  |
| N_LA             | GainesvilleFL    | 0.91397  | 0.91028  |
| N_LA             | EconfinaFL       | 0.30306  | 0.29791  |
| N_LA             | InvernessFL      | 0.87708  | 0.87177  |
| N_LA             | PalatkaFL        | 0.37047  | 0.36624  |
| N_LA             | DocThomasFL      | 0.76474  | 0.75783  |
| ChipolaRiverFL   | HighlandHammocks | 0.94685  | 0.94485  |
| ChipolaRiverFL   | FloralCityFL     | 0.86603  | 0.86081  |
| ChipolaRiverFL   | Chipola_River    | -0.14286 | -0.14286 |
| ChipolaRiverFL   | HoustonTX        | 0.54639  | 0.54545  |
| ChipolaRiverFL   | RedRoadFL        | 0.83576  | 0.83129  |
| ChipolaRiverFL   | ParklandFL       | 0.82235  | 0.81711  |
| ChipolaRiverFL   | GainesvilleFL    | 0.96387  | 0.96226  |
| ChipolaRiverFL   | EconfinaFL       | 0.30842  | 0.30729  |
| ChipolaRiverFL   | InvernessFL      | 0.92318  | 0.92     |
| ChipolaRiverFL   | PalatkaFL        | 0.40387  | 0.40206  |
| ChipolaRiverFL   | DocThomasFL      | 0.81428  | 0.80952  |
| HighlandHammocks | FloralCityFL     | 0.83578  | 0.8301   |
| HighlandHammocks | Chipola_River    | 0.94685  | 0.94485  |
| HighlandHammocks | HoustonTX        | 0.9425   | 0.94017  |
| HighlandHammocks | RedRoadFL        | 0.84251  | 0.83707  |
| HighlandHammocks | ParklandFL       | 0.82211  | 0.81602  |
| HighlandHammocks | GainesvilleFL    | 0.94064  | 0.93842  |
| HighlandHammocks | EconfinaFL       | 0.57709  | 0.57802  |
| HighlandHammocks | InvernessFL      | 0.89477  | 0.89104  |
| HighlandHammocks | PalatkaFL        | 0.82363  | 0.81818  |
| HighlandHammocks | DocThomasFL      | 0.82768  | 0.82189  |
| FloralCityFL     | Chipola_River    | 0.86603  | 0.86081  |
| FloralCityFL     | HoustonTX        | 0.86578  | 0.86014  |

|               |               |          |          |
|---------------|---------------|----------|----------|
| FloralCityFL  | RedRoadFL     | 0.74149  | 0.73299  |
| FloralCityFL  | ParklandFL    | 0.74331  | 0.73383  |
| FloralCityFL  | GainesvilleFL | 0.14246  | 0.14493  |
| FloralCityFL  | EconfinaFL    | 0.277    | 0.27198  |
| FloralCityFL  | InvernessFL   | -0.02921 | -0.0274  |
| FloralCityFL  | PalatkaFL     | 0.75522  | 0.74631  |
| FloralCityFL  | DocThomasFL   | 0.72936  | 0.72045  |
| Chipola_River | HoustonTX     | 0.54639  | 0.54545  |
| Chipola_River | RedRoadFL     | 0.83576  | 0.83129  |
| Chipola_River | ParklandFL    | 0.82235  | 0.81711  |
| Chipola_River | GainesvilleFL | 0.96387  | 0.96226  |
| Chipola_River | EconfinaFL    | 0.30842  | 0.30729  |
| Chipola_River | InvernessFL   | 0.92318  | 0.92     |
| Chipola_River | PalatkaFL     | 0.40387  | 0.40206  |
| Chipola_River | DocThomasFL   | 0.81428  | 0.80952  |
| HoustonTX     | RedRoadFL     | 0.82702  | 0.82224  |
| HoustonTX     | ParklandFL    | 0.81382  | 0.80826  |
| HoustonTX     | GainesvilleFL | 0.95891  | 0.95696  |
| HoustonTX     | EconfinaFL    | 0.37279  | 0.37037  |
| HoustonTX     | InvernessFL   | 0.92083  | 0.91729  |
| HoustonTX     | PalatkaFL     | 0.49017  | 0.4874   |
| HoustonTX     | DocThomasFL   | 0.80507  | 0.8      |
| RedRoadFL     | ParklandFL    | 0.18057  | 0.17885  |
| RedRoadFL     | GainesvilleFL | 0.84098  | 0.83613  |
| RedRoadFL     | EconfinaFL    | 0.492    | 0.48938  |
| RedRoadFL     | InvernessFL   | 0.79906  | 0.79263  |
| RedRoadFL     | PalatkaFL     | 0.69934  | 0.69159  |
| RedRoadFL     | DocThomasFL   | -0.02712 | -0.02798 |
| ParklandFL    | GainesvilleFL | 0.83733  | 0.83158  |
| ParklandFL    | EconfinaFL    | 0.5002   | 0.49587  |
| ParklandFL    | InvernessFL   | 0.79606  | 0.78873  |
| ParklandFL    | PalatkaFL     | 0.69834  | 0.68966  |
| ParklandFL    | DocThomasFL   | 0.04539  | 0.04514  |
| GainesvilleFL | EconfinaFL    | 0.31398  | 0.31472  |
| GainesvilleFL | InvernessFL   | 0.17252  | 0.17241  |
| GainesvilleFL | PalatkaFL     | 0.84025  | 0.83516  |
| GainesvilleFL | DocThomasFL   | 0.82874  | 0.82346  |
| EconfinaFL    | InvernessFL   | 0.29185  | 0.29108  |
| EconfinaFL    | PalatkaFL     | 0.23407  | 0.23176  |
| EconfinaFL    | DocThomasFL   | 0.46485  | 0.46227  |
| InvernessFL   | PalatkaFL     | 0.80016  | 0.79348  |
| InvernessFL   | DocThomasFL   | 0.78627  | 0.77941  |
| PalatkaFL     | DocThomasFL   | 0.68417  | 0.67604  |
